# Supplementary material for: Electron and phonon properties and gas storage in carbon honeycombs
Source: Royal Society of Chemistry journal article supplement (doi:10.1039/c6nr03655d), 2016-01-01
Supplement: c6nr03655d1.pdf [file c6nr03655d1.pdf]

## Supporting Information (SI)

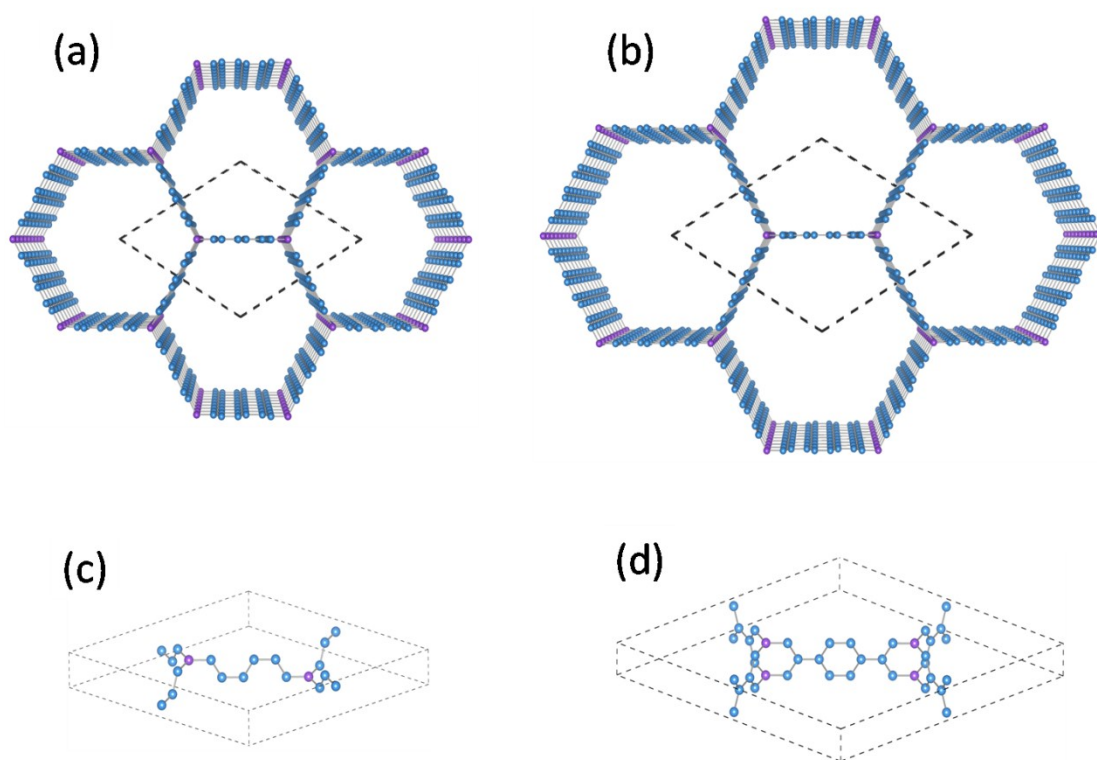

FIG S1. Atomic structures of (a) CHC-3 and (b) CHC-4. Legends are the same as in Fig. 1.

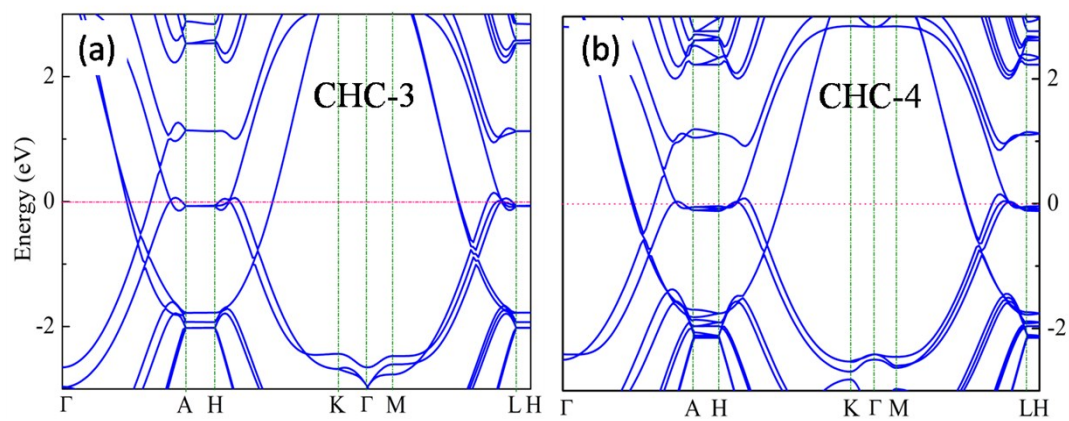

FIG S2. DFT band structures of (a) CHC-3 and (b) CHC-4.

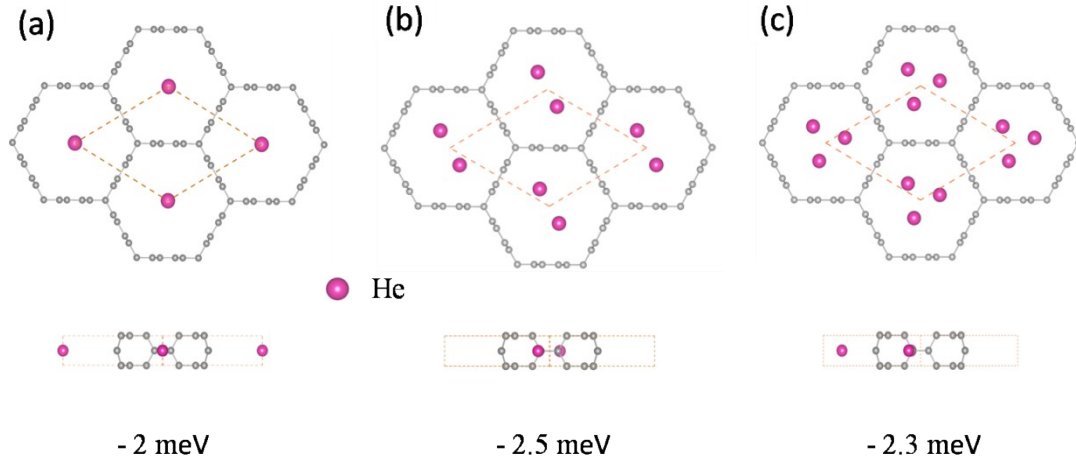

FIG S3. Top and side views of (a) one, (b) two, (c) three He adsorption in the  $1\times 1\times 1$  primitive cell of CHC-2. Average adsorption energy  $E_N/N$  has been indicated. Legends are the same as in Fig. 6.

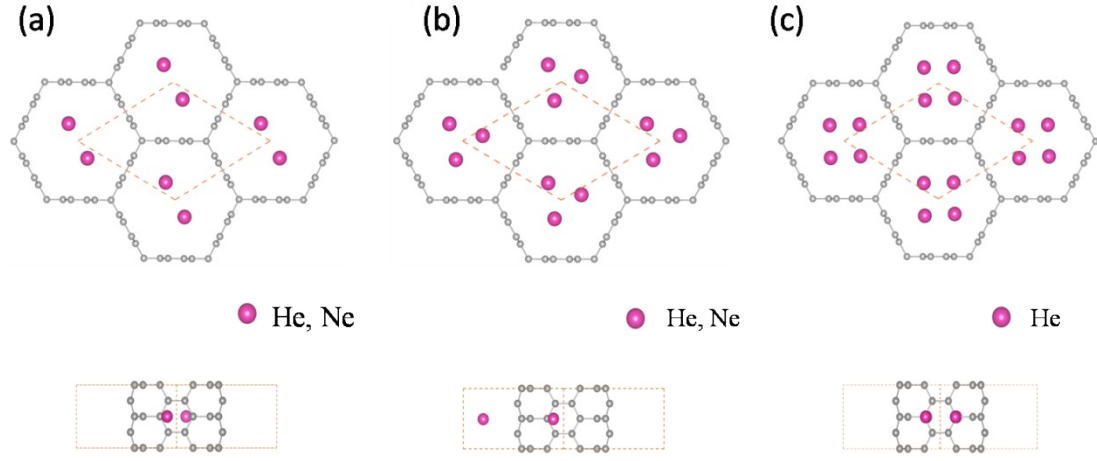

FIG S4. Top and side views of (a) two, (b) three, (c) four inert gas atoms adsorption in the  $1 \times 1 \times 2$  supercell of CHC-2. Legends are the same as in Fig. 6.

Table S1. Consecutive adsorption energy  $\delta E_c$  for He loading of CHC-4. All energies are given in meV/He.  $\rho$  is the corresponding adsorption density in atomic weight percent.

| #adsorbent | $\delta E_c$ | $\rho$ (wt%) |
|------------|--------------|--------------|
| 16         | -16          | 17.0         |
| 17         | -12          | 17.9         |
| 18         | -10          | 18.8         |
| 19         | -7           | 19.6         |
| 20         | +10          | 20.4         |
